# Supplementary material for: p38-MAPK-mediated translation regulation during early blastocyst development is required for primitive endoderm differentiation in mice
Source: PubMed Central journal article supplement (PMC8233355; doi:10.1038/s42003-021-02290-z), 2021-06-25
Supplement: 42003_2021_2290_MOESM2_ESM.pdf [file 42003_2021_2290_MOESM2_ESM.pdf]

Supplementary Fig. 1

a) Genes significantly differentially expressed in E3.5 +4 hours.

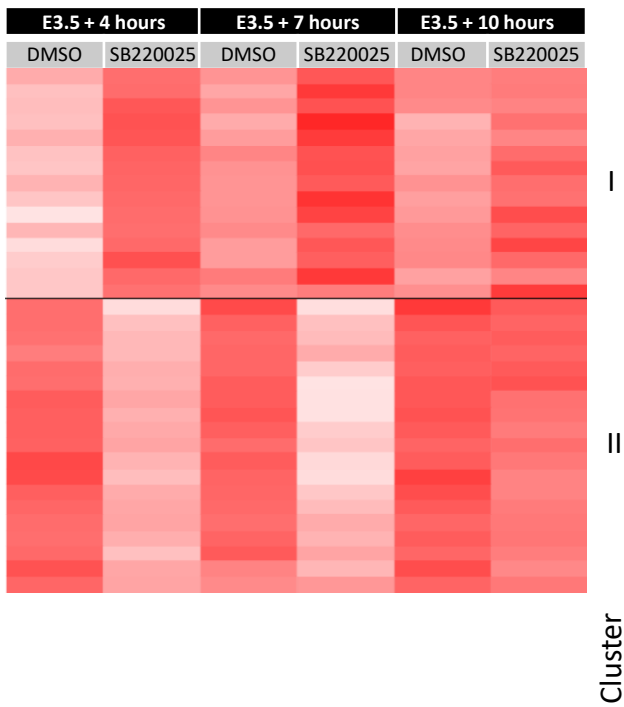

b) Genes significantly differentially expressed in E3.5 +10 hours.

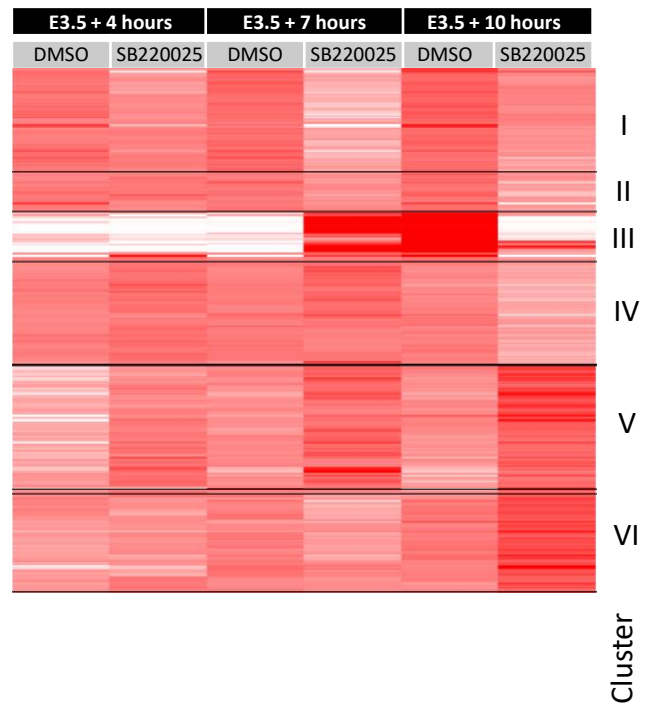

Hierarchical clustering heat-map depicting the expression of significantly changing gene mRNAs elicited by p38-MAPKi at the +4h (a) and +10h (b) time-points and the status of the transcript levels of those same genes at the two other time-points; forming two and six distinct expression clusters respectively (details in Supplementary Data 1).

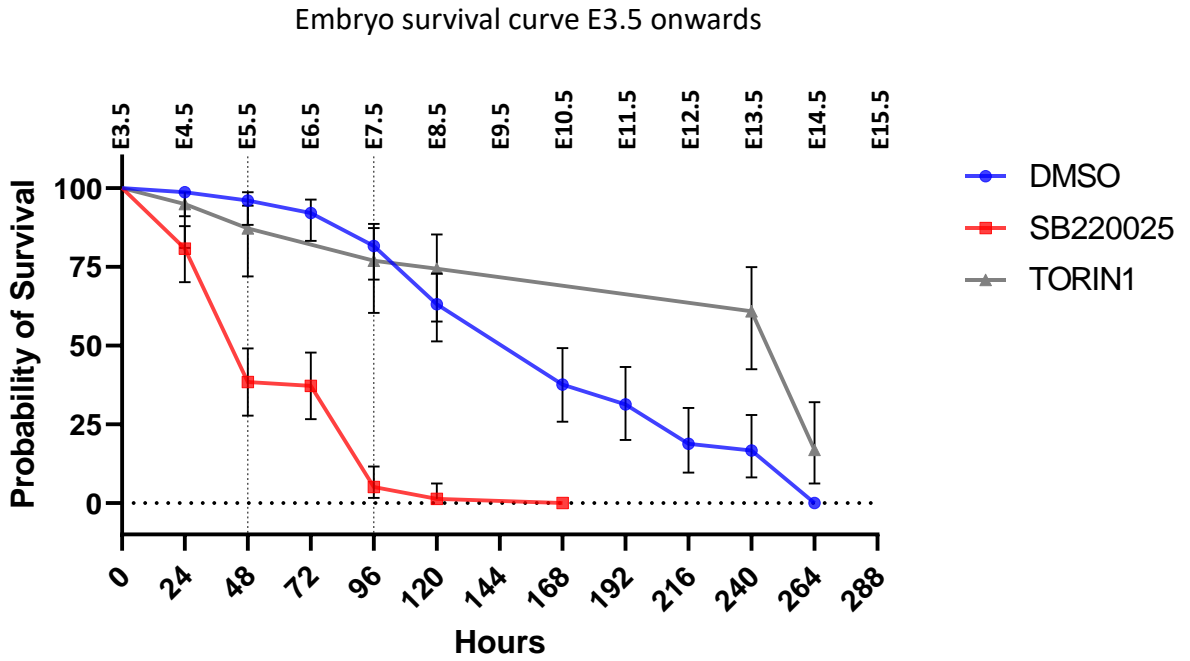

Brightfield images based analysis of survival of embryos cultured in control (DMSO; n=76), p38-MAPK inhibited (SB220025; n=78) and mTOR inhibited (TORIN1; n=39) conditions starting from E3.5.

## Gene expression profile in preimplantation embryo and associated cellular lineages

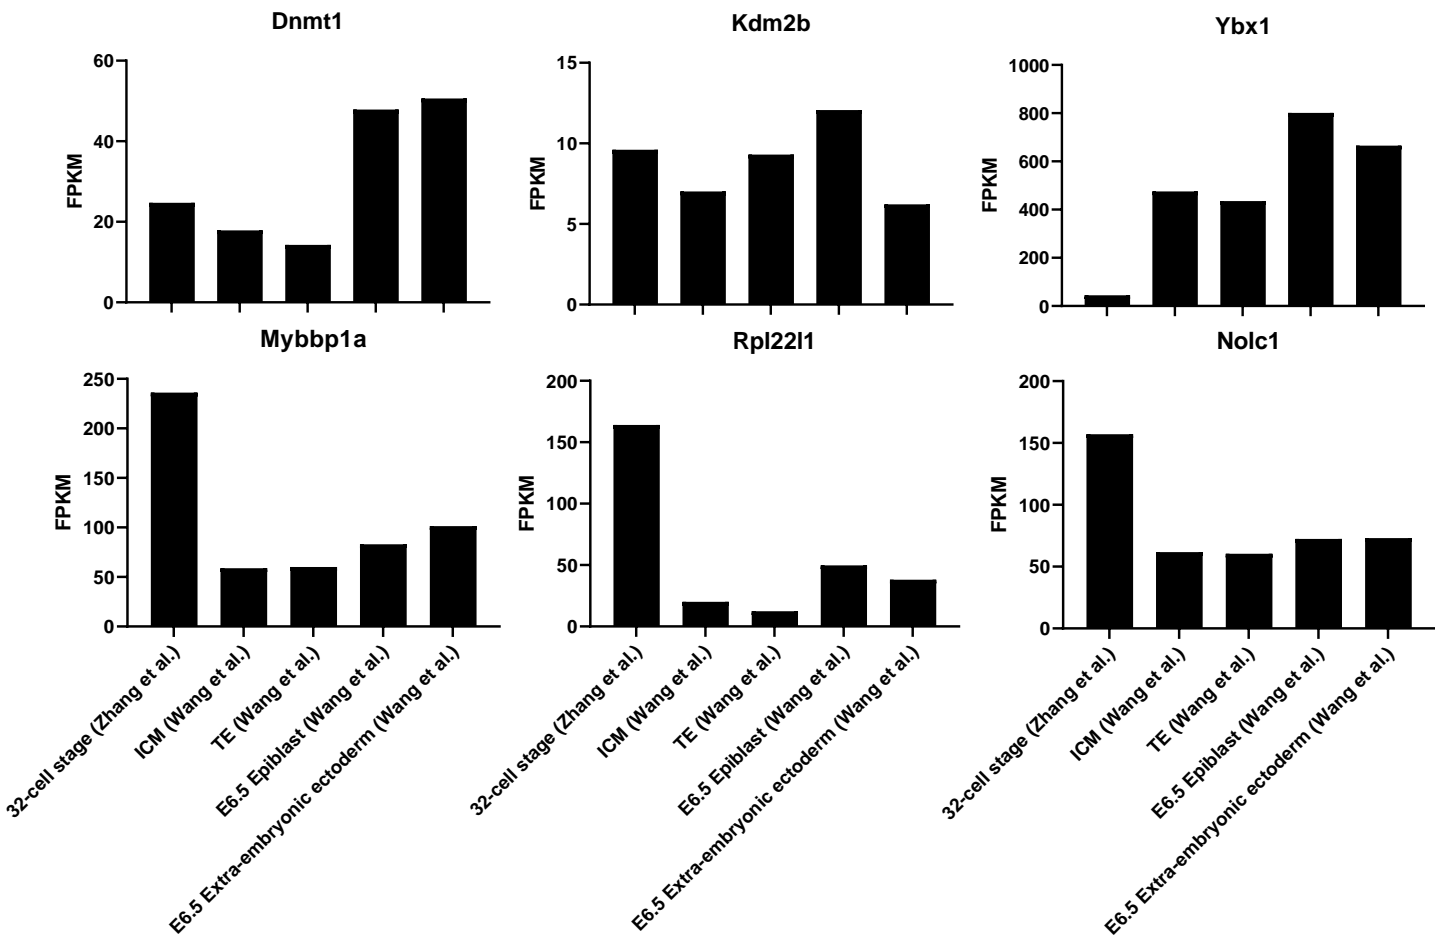

Gene expression profile of candidates identified via phosphoproteomic screen for siRNA mediated gene knockdown analysis in preimplantation embryos. Data collected from *Zhang, B., Zheng, H., Huang, B. et al. Allelic reprogramming of the histone modification H3K4me3 in early mammalian development. Nature 537, 553–557 (2016)* and *Wang, C., Liu, X., Gao, Y. et al. Reprogramming of H3K9me3-dependent heterochromatin during mammalian embryo development. Nat Cell Biol 20, 620–631 (2018)*.

Supplementary Fig. 4 (supplementary to Fig. 6d-f)

Mybbp1a KD embryo cell lineage quantification (outer and inner cells and ratio of PrE to ICM).

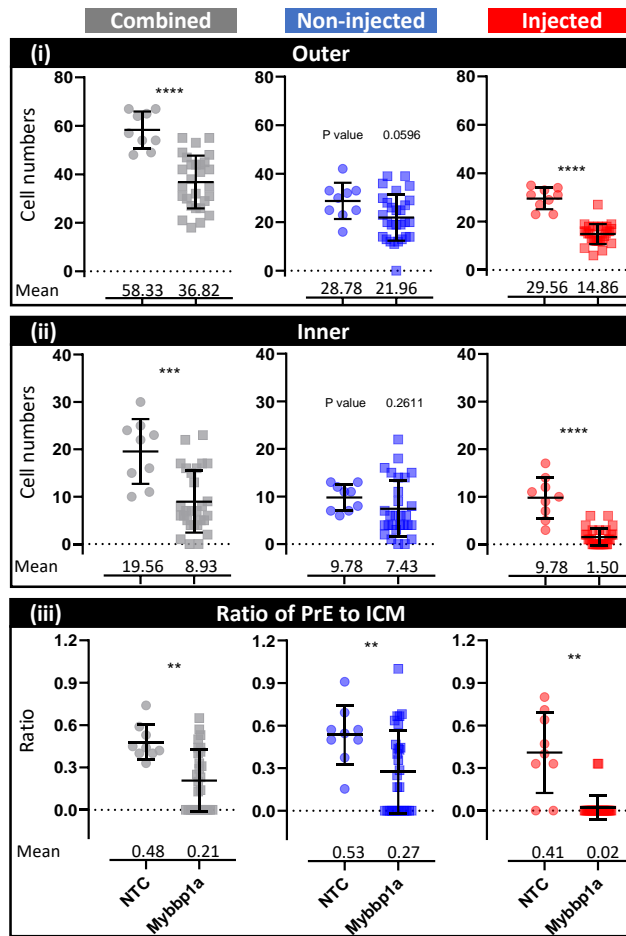

Quantification of the number of inner and outer cells and ratio of GATA4 expressing PrE to ICM upon clonal Mybbp1a knockdown. Data is supplementary to that in figure 6 (d-f).

Supplementary Fig. 5

Cellular lineage and cell numbers with addition of FGF4 (+Heparin) along with p38-MAPK inhibition.

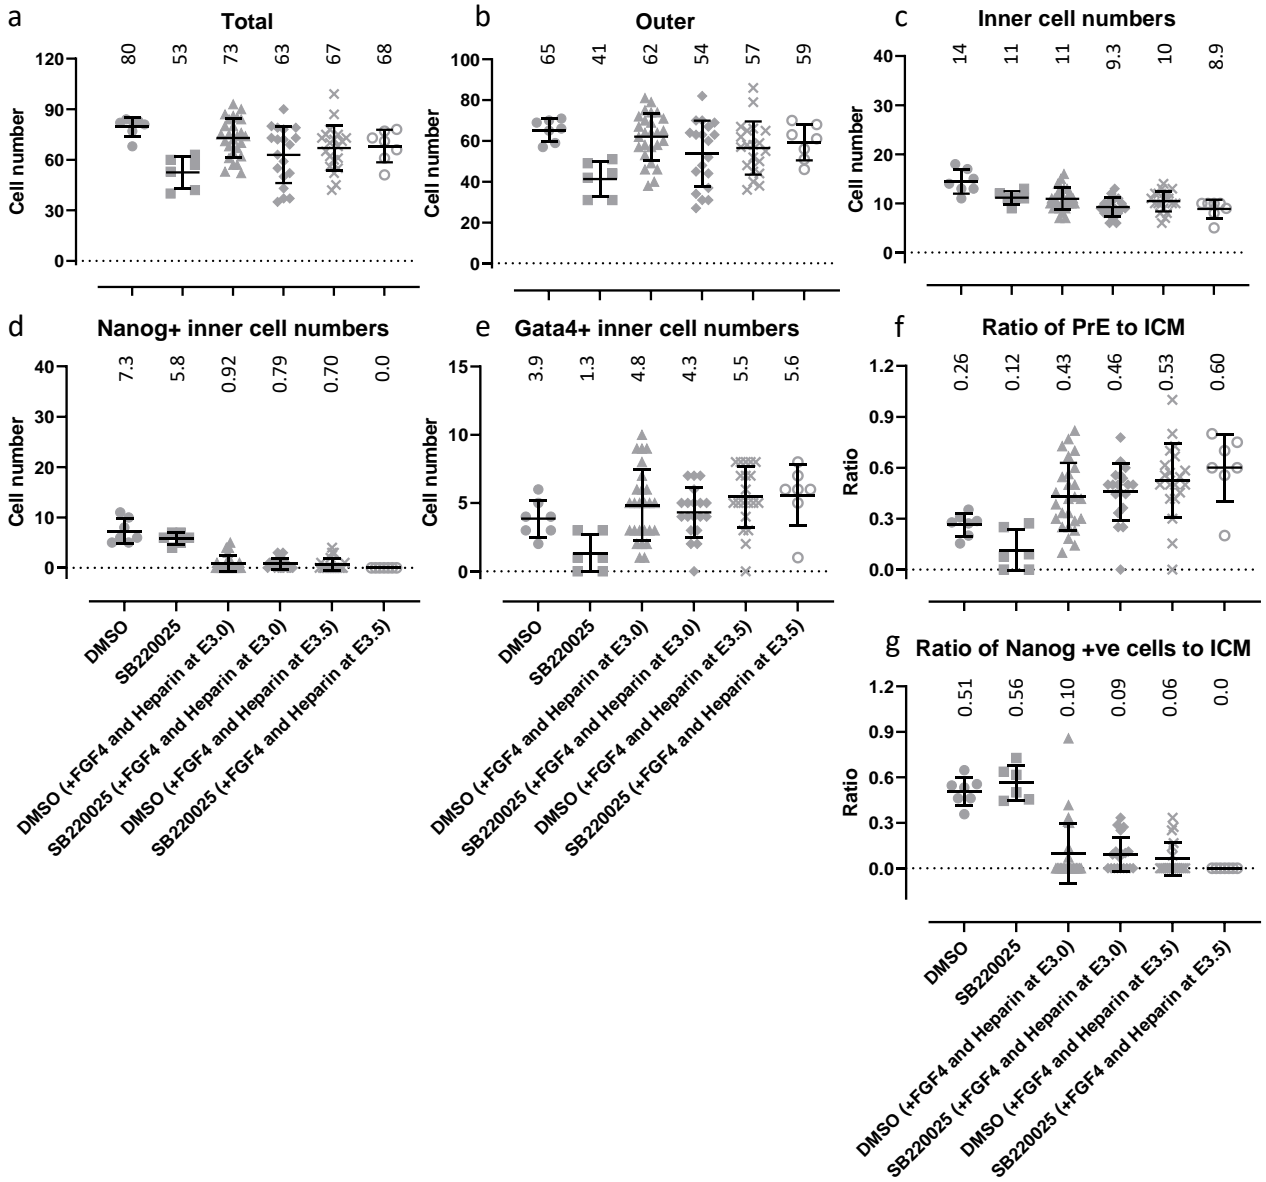

Cellular lineage and number quantification upon p38-MAPK inhibition coupled with FGF4 (+Heparin) supplementation. p38-MAPK inhibition (SB220025) and control (DMSO) treatments are beginning from E3.5, addition of FGF4 (+Heparin) was carried out at either E3.0 or E3.5. DMSO (n=7), SB220025 (n=6), DMSO + (FGF4 (+Heparin) from E3.0) (n=26), SB220025 + (FGF4 (+Heparin) from E3.0) (n=19), DMSO + (FGF4 (+Heparin) from E3.5) (n=20) and SB220025 + (FGF4 (+Heparin) from E3.5) (n=7). Tabulated cell numbers and statistical test results are in Supplementary Data1. Statistical tests used are detailed in Supplementary Table 8.

Supplementary Fig. 6

Cellular lineage and cell numbers with addition of FGF4 (+Heparin) along with MEK inhibition (PD0325901).

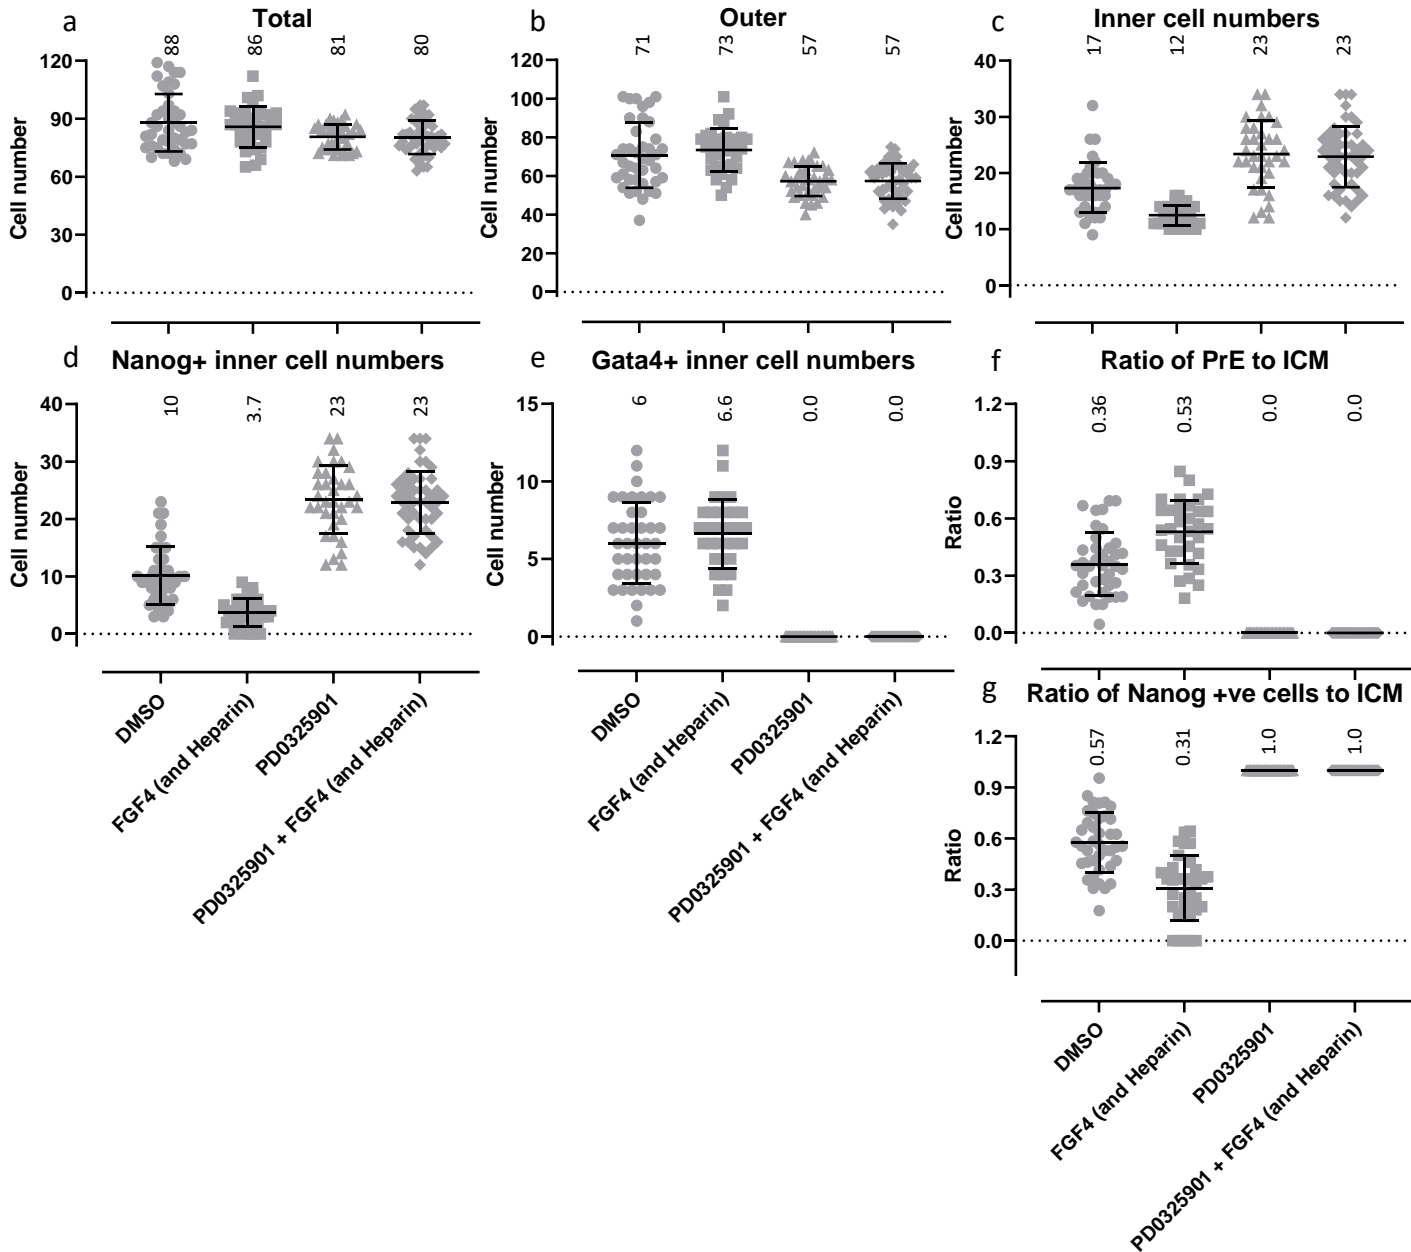

Cellular lineage and number quantification upon MEK inhibition coupled with FGF4 (+Heparin) supplementation. MEK inhibition (PD0325901) and control (DMSO) treatments are beginning from E3.5, addition of FGF4 (+Heparin) was carried out at E3.5. DMSO (n=40), FGF4 (+Heparin) (n=33), PD0325901 (n=35) and PD0325901 + FGF4 (+Heparin) (n=49). Tabulated cell numbers and statistical test results are in Supplementary Data1. Statistical tests used are detailed in Supplementary Table 8.

Blastocyst size for embryos inhibited for 24 hours (E3.5 to E4.5)

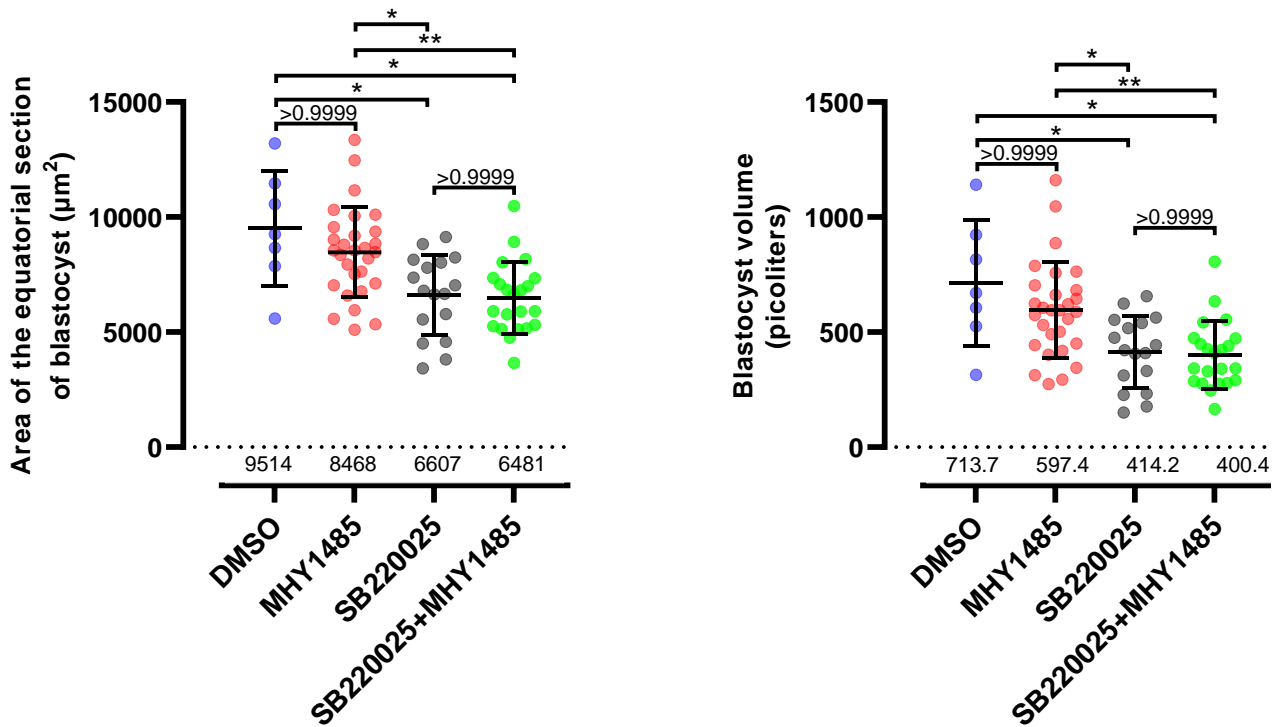

Quantification of blastocyst equatorial area (µm<sup>2</sup>) and volume (picoliters, pL) in fixed blastocysts cultured (E3.5-E4.5) in control (DMSO; n=7), mTORa (MHY1485; n=29), p38-MAPKi (SB220025; n=17) and p38-MAPKi + mTORa (SB220025+MHY1485; n=22) conditions.

## Supplementary Table 1

Atp1a1 proteome readout

| Uniprot_ID | Gene Symbol | log2_FC     | p-value     | DMSO_1 | DMSO_2 | DMSO_3 | p38i_1 | p38i_2 | p38i_3 | DMSO_mean | p38i_mean |
|------------|-------------|-------------|-------------|--------|--------|--------|--------|--------|--------|-----------|-----------|
| Q8VDN2     | Atp1a1      | 0.015634914 | 0.891866342 | 25.98  | 25.99  | 25.84  | 25.8   | 25.96  | 26.1   | 25.94     | 25.95     |



## Supplementary Table 2

Introns detected (as RPKM) for "translation" related genes; related to Fig. 3e and table S3e

| Sl. No. | Probe | Chromosome | Start     | End       | Probe Strand | Feature | E3.5 +7h (DMSO) | E3.5 +7h (SB220025) |
|---------|-------|------------|-----------|-----------|--------------|---------|-----------------|---------------------|
| 1       | Rps20 | 4          | 3831334   | 3835665   | -            | null    | 4.335468        | 5.4814467           |
| 2       | Rps9  | 7          | 3703993   | 3706897   | +            | null    | 6.2938595       | 8.691212            |
| 3       | Rps19 | 7          | 24884371  | 24889806  | +            | null    | 3.595584        | 4.8586073           |
| 4       | Rps16 | 7          | 28350652  | 28353155  | +            | null    | 5.842512        | 5.757571            |
| 5       | Rps17 | 7          | 81342732  | 81345254  | -            | null    | 5.08963         | 5.088256            |
| 6       | Rps3  | 7          | 99477896  | 99483738  | -            | null    | 10.089131       | 10.129799           |
| 7       | Rpsa  | 9          | 120127689 | 120132369 | +            | null    | 5.8119106       | 6.4425263           |
| 8       | Rps26 | 10         | 128624534 | 128626747 | -            | null    | 7.9579744       | 8.017336            |
| 9       | Rps29 | 12         | 69157722  | 69159186  | -            | null    | 6.3753366       | 7.874689            |
| 10      | Rps23 | 13         | 90922958  | 90924950  | +            | null    | 4.6760044       | 5.5858107           |
| 11      | Rpl30 | 15         | 34440505  | 34443640  | -            | null    | 4.1983867       | 4.612251            |
| 12      | Rps18 | 17         | 33951999  | 33956001  | -            | null    | 5.2112346       | 7.1981916           |
| 13      | Rps14 | 18         | 60774510  | 60778546  | +            | null    | 7.8575892       | 8.69915             |

## Supplementary Table 3

## Pharmacological agents used

| Sl. No. | Name                | Pharmacological activity                                        | Working concentration | Manufacturer  | Cat. No. | Embryonic stage               | Duration                     | Figures                    |
|---------|---------------------|-----------------------------------------------------------------|-----------------------|---------------|----------|-------------------------------|------------------------------|----------------------------|
| 1       | SB220025            | p38-MAPK inhibitor                                              | 20µM                  | Calbiochem    | 559396   | E3.5 to E4.5                  | 24 hours                     | 1a (i), b, c, 6c, f, i, S5 |
| 2       |                     |                                                                 |                       |               |          | E3.5+4 hours to E3.5+7 hours  | 3 hours                      | 1a (ii)                    |
| 3       |                     |                                                                 |                       |               |          | E3.5 to E3.5+3 hours          | 3 hours                      | 1d                         |
| 4       |                     |                                                                 |                       |               |          | E3.5 to E3.5+6 hours          | 6 hours                      | 1d                         |
| 5       |                     |                                                                 |                       |               |          | E3.5 to E3.5+9 hours          | 9 hours                      | 1d                         |
| 6       |                     |                                                                 |                       |               |          | E3.5 to E3.5+12 hours (E4.0)  | 12 hours                     | 1d                         |
| 7       |                     |                                                                 |                       |               |          | E3.5+2 hours to E3.5+9 hours  | 7 hours                      | 2                          |
| 8       |                     |                                                                 |                       |               |          | E3.5 to E3.5+4 hours          | 4 hours                      | 3                          |
| 9       |                     |                                                                 |                       |               |          | E3.5 to E3.5+7 hours          | 7 hours                      | 3                          |
| 10      |                     |                                                                 |                       |               |          | E3.5 to E3.5+10 hours         | 10 hours                     | 3, 5                       |
| 11      | TORIN1              | mTORC1/2 inhibitor                                              | 20µM                  | SelleckChem   | S2827    | E3.5 to E4.5                  | 24 hours                     | 6d                         |
| 12      | MHY1485             | mTOR activator                                                  | 20µM                  | SelleckChem   | S7811    | E3.5 to E4.5                  | 24 hours                     | 6e, h, i                   |
| 13      | PD0325901           | MEK inhibitor                                                   | 1µM                   | Sigma-Aldrich | PZ0162   | E3.5 to E4.5                  | 24 hours                     | 6g, h, S5, S6              |
| 14      | mFGF4               | Recombinant mouse FGF4 protein (activates FGF4-MEK/ERK pathway) | 1000ng/ml             | R&D Systems   | S846-F4  | E3.0 to E4.5 and E3.5 to E4.5 | 36 and 24 hours respectively | S5, S6                     |
| 15      | Heparin sodium salt | Enhances receptor binding of FGF4                               | 1µg/ml                | Sigma-Aldrich | H3149    | E3.0 to E4.5 and E3.5 to E4.5 | 36 and 24 hours respectively | S5, S6                     |

## Supplementary Table 4

siRNA

| Sl. No. | Target (siRNA)   | Working concentration | Manufacturer                      | Cat. No.   | Assay ID |
|---------|------------------|-----------------------|-----------------------------------|------------|----------|
| 1       | Negative Control | 10 $\mu$ M            | QIAGEN GeneGlobe                  | SI03650318 |          |
| 2       | Mybbp1a          | 10 $\mu$ M            | Thermo Scientific Silencer Select | AM16708    | 156950   |
| 3       | Rpl2211          | 10 $\mu$ M            | Thermo Scientific Silencer Select | 4390771    | s86106   |
| 4       | Kdm2b            | 10 $\mu$ M            | Thermo Scientific Silencer Select | 4390771    | s78199   |
| 5       | Nolc1            | 10 $\mu$ M            | Thermo Scientific Silencer Select | AM16708    | 287747   |
| 6       | Ybx1             | 10 $\mu$ M            | Thermo Scientific Silencer Select | AM16708    | 187614   |
| 7       | Dnmt1            | 10 $\mu$ M            | Thermo Scientific Silencer Select | 4390771    | s65072   |

Supplementary Table 5

## Antibodies

| Sl. No.                           | Antibody against                                                                       | Type                  | Target                 | Host / isotype      | Manufacturer                                 | Catalogue number | Dilution used          |
|-----------------------------------|----------------------------------------------------------------------------------------|-----------------------|------------------------|---------------------|----------------------------------------------|------------------|------------------------|
| <b>Immunofluorescence imaging</b> |                                                                                        |                       |                        |                     |                                              |                  |                        |
| 1                                 | Nanog (eBioMLC-51)                                                                     | Primary; monoclonal   | Mouse                  | Rat / IgG2a         | Thermo Fisher Scientific Inc. (eBioscience™) | 14-5761-80       | 1:200 in PBST (3% BSA) |
| 2                                 | GATA-4 (H-112)                                                                         | Primary; polyclonal   | Mouse, rat and human   | Rabbit / IgG        | Santa Cruz Biotechnology, Inc.               | sc-9053          | 1:200 in PBST (3% BSA) |
| 3                                 | GATA-6                                                                                 | Primary; polyclonal   | Human and mouse        | Goat / IgG          | R&D Systems™                                 | AF1700           | 1:200 in PBST (3% BSA) |
| 4                                 | CDX2 (CDX2-88)                                                                         | Primary; monoclonal   | Conserved              | Mouse / IgG1, kappa | BioGenex                                     | MU392A-5UC       | 1:200 in PBST (3% BSA) |
| 5                                 | Acetyl-Histone H4 (Lys16)                                                              | Primary; polyclonal   | Mouse, rat and human   | Rabbit / IgG        | Merck KGaA (Sigma-Aldrich, Inc.) (Upstate®)  | 07-329           | 1:100 in PBST (3% BSA) |
| 6                                 | RNA polymerase II CTD repeat YSPTSPS (phospho S2)                                      | Primary; polyclonal   | Mouse, rat, human etc. | Rabbit / IgG        | Abcam plc.                                   | ab5095           | 1:100 in PBST (3% BSA) |
| 7                                 | Donkey anti-Rat IgG (H+L) Highly Cross-Adsorbed Secondary Antibody, Alexa Fluor 488    | Secondary; polyclonal | Rat                    | Donkey / IgG        | Thermo Fisher Scientific Inc.                | A-21208          | 1:500 in PBST (3% BSA) |
| 8                                 | Donkey anti-Rabbit IgG (H+L) Highly Cross-Adsorbed Secondary Antibody, Alexa Fluor 555 | Secondary; polyclonal | Rabbit                 | Donkey / IgG        | Thermo Fisher Scientific Inc.                | A-31572          | 1:500 in PBST (3% BSA) |
| 9                                 | Donkey Anti-Goat IgG H&L (Alexa Fluor® 647)                                            | Secondary; polyclonal | Goat                   | Donkey / IgG        | Abcam plc.                                   | ab150131         | 1:500 in PBST (3% BSA) |
| 10                                | Donkey Anti-Rabbit IgG H&L (Alexa Fluor® 647)                                          | Secondary; polyclonal | Rabbit                 | Donkey / IgG        | Abcam plc.                                   | ab150075         | 1:500 in PBST (3% BSA) |
| 11                                | Goat Anti-Rat IgG H&L (Cy3 ®) preadsorbed                                              | Secondary; polyclonal | Rat                    | Goat / IgG          | Abcam plc.                                   | ab98416          | 1:500 in PBST (3% BSA) |
| 12                                | Donkey anti-Mouse IgG (H+L) Highly Cross-Adsorbed Secondary Antibody, Alexa Fluor 488  | Secondary; polyclonal | Mouse                  | Donkey / IgG        | Thermo Fisher Scientific Inc.                | A-21202          | 1:500 in PBST (3% BSA) |

Supplementary Table 6

Primers used

| Sl. No. | Primer                                | Sequence (5'→3')         |                           | Figures    | Comments                                                                     |
|---------|---------------------------------------|--------------------------|---------------------------|------------|------------------------------------------------------------------------------|
|         |                                       | Sense                    | Antisense                 |            |                                                                              |
| 1       | Tbp                                   | GAAGAAACATCCAGACTAGCAGCA | CCTTATAGGGAACCTCACATCACAG | 1d         | Q-RTPCR                                                                      |
| 2       | H2afz                                 | GCGCAGCCATCCTGGAGTA      | CCGATCAGCGATTTGTGGA       | 4b, 5e (i) |                                                                              |
| 3       | Nanog                                 | GGTTGAAGACTAGCAATGGTCTGA | TGCAATGGATGCTGGGATACTC    | 1d         |                                                                              |
| 4       | Gata4                                 | CAAGCAGGACTCTTGAACA      | AGCAGGAATTTGAAGAGGGA      | 1d         |                                                                              |
| 5       | Mapk11                                | AATGTAGCGGTGAACGAGGA     | CCAGATGTCCACTGTCTGGT      | 1d         |                                                                              |
| 6       | Mapk12                                | TATATCCATGCGGCTGGTGT     | ATGTCCACTGTCTGCGTGTA      | 1d         |                                                                              |
| 7       | Mapk13                                | CAGCGAGGATAAGTCCAGT      | TCCAGGATCTTCAGCTCACA      | 1d         |                                                                              |
| 8       | Mapk14                                | ACATCGTGAAGTCCAGAAG      | CTAGGTTGCTGGGCTTTAGG      | 1d         |                                                                              |
| 9       | Mybbp1a                               | GTCTCTGCCGCTCTGTCA       | GGGATGATCTAAATAGGTTTTGG   | 4b         |                                                                              |
| 10      | 18S rRNA                              | CTCAACACGGGAAACCTCAC     | CGTCCACCAACTAAGAACG       | 5c, d      |                                                                              |
| 11      | 28S rRNA                              | CTAAATACCGGCACGAGACC     | TTCACGCCCTTTGAACTCT       | 5c, d      |                                                                              |
| 12      | 45S pre-rRNA 5' ETS amplicon (1)      | TCTCGTTGTTTCTCCGAT       | GATGGGGTGGAGAGACGAG       | 5e, e (i)  | Q-RTPCR (rRNA processing (from Corsini et al. <i>Cell Stem Cell</i> (2018))) |
| 13      | 45S 5' ETS & 18S overlap amplicon (2) | GCGCTTCCTACCTGGTTG       | CCGTCGGCATGTATTAGCTC      | 5e, e (i)  |                                                                              |
| 14      | 18S rRNA amplicon (3)                 | CTGGATACCGCAGCTAGGAA     | GAATTCACCTTAGCGGCG        | 5e, e (i)  |                                                                              |
| 15      | ITS1 amplicon (4)                     | GTCTCGTTTCGTTCTGCTG      | TATTCGGGTGTGAGCGAAC       | 5e, e (i)  |                                                                              |
| 16      | 5.8S rRNA amplicon (5)                | GTGGATCACTCGGCTCGTG      | GCAAGTGCCTTCGAAAGTGC      | 5e, e (i)  |                                                                              |
| 17      | ITS2 amplicon (6)                     | TCCCGAAGTTCAGACGTGTG     | AGAAAGACTGGTGGGAGCAGC     | 5e, e (i)  |                                                                              |
| 18      | 45S ITS2 & 28S overlap amplicon (7)   | CTCCTCGCTCTTCTTCCC       | CTGTTCACTCGCCGTTACTG      | 5e, e (i)  |                                                                              |
| 19      | 28S rRNA amplicon (8)                 | AGTAACGGCGAGTGAACAGG     | GATCAGAAGGACTTGGGCC       | 5e, e (i)  |                                                                              |
