# Supplementary material for: p38-MAPK-mediated translation regulation during early blastocyst development is required for primitive endoderm differentiation in mice
Source: PubMed Central journal article supplement (PMC8233355; doi:10.1038/s42003-021-02290-z), 2021-06-25
Supplement: 42003_2021_2290_MOESM3_ESM.pdf [file 42003_2021_2290_MOESM3_ESM.pdf]

## **Description of Additional Supplementary Files**

**File name:** Supplementary Video 1

**Description:** Control (DMSO) E3.5 to E4.5 (first set of 16 embryos).

**File name:** Supplementary Video 2

**Description:** Control (DMSO) E3.5 to E4.5 (second set of 16 embryos).

**File name:** Supplementary Video 3

**Description:** Control (DMSO) E3.5 to E4.5 (One representative embryo magnified).

**File name:** Supplementary Video 4

**Description:** p38-MAPKi (SB220025) E3.5 to E4.5 (first set of 16 embryos).

**File name:** Supplementary Video 5

**Description:** p38-MAPKi (SB220025) E3.5 to E4.5 (second set of 16 embryos).

**File name:** Supplementary Video 6

**Description:** p38-MAPKi (SB220025) E3.5 to E4.5 (One representative embryo magnified).

**File name:** Supplementary Data 1

**Description:** Underlying source data corresponding to each figure and supplementary figure.

**File name:** Supplementary Data 2

**Description:** Contains following information:

- p38-MAPK consensus motifs: Putative p38-MAPK consensus motifs and/or reported p38-MAPK interaction for phosphopeptides identified.
- Additional candidate KDs: Additional phosphoproteome candidate knockdown.
- Statistical tests: Statistical tests.
